# Supplementary material
Source: Springer Nature journal article supplement (https://www.springermedizin.de/resource/supplementary/12936_2013_2832_MOESM7_ESM.pdf/9544308)

# Sporogonic cycle

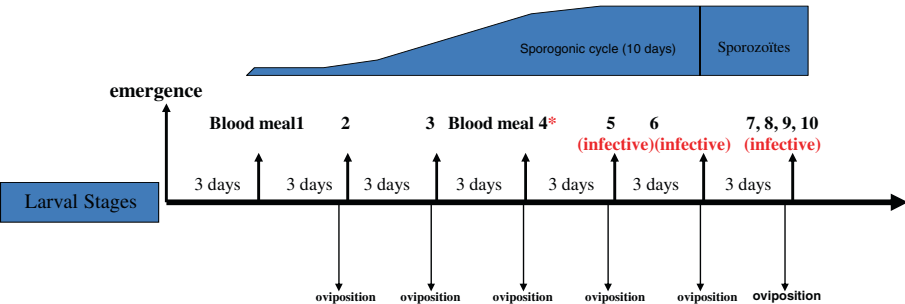

\* Infective bite

Supplement: MOESM7 [file 9544308]
